# Supplementary material
Source: HighWire-hosted journal article supplement (doi:10.1101/rna.042838.113)
Supplement: SuppFigLegends.docx [file SuppFigLegends.docx]

Supplemental Figure 1: Sequence alignment of Sad1 homologues from *S. cerevisiae* (*S.c.*) Sad1, *S. pombe* (*S.p.*) UBP10, and *H. sapiens* (*H.s.)* USP39 produced using the T-coffee server. Pseudo-catalytic triad residues of Sad1 are indicated by asterisks. Conserved inter-domain residues that interact via hydrogen bonds are indicated by blue spheres. Conserved inter-domain residues that participate in hydrophobic interactions are indicated by orange spheres. The residues that comprise the Sad1 ZnF-UBP B-site zinc finger are denoted with green Bs. The WRY motif residues that are essential for ubiquitin binding in USP5 are labeled with red arrowheads, these residues occur as YRL in Sad1 and its homologues. Conservation is indicated by shades of gray and gaps in the alignment are represented by dashes. Below the alignment is the USP consensus sequence derived from an alignment of all USPs from *H. sapiens* and *S. cerevisiae* (Ye et al. 2009). The Cys, QDE and His boxes that define the USP catalytic cleft are noted.

Supplemental Figure 2: Measuring the binding affinity of Sad1 and

USP5 ZnF-UBP for ubiquitin by biolayer interferometry (BLI). (A) BLI association response curves for the indicated concentrations of USP5 ZnF-UBP binding to ubiquitin that was immobilized on streptavidin coated biosensors. The raw data represent the average of two experiments (red). Curves were fit using a one-phase association equation (black) to determine the amount of titrant bound at saturation (response at equilibrium, Req). (B) BLI association response curves for the indicated concentrations of Sad1 binding to ubiquitin immobilized on streptavidin coated response tips. The raw data represent the average of two experiments (red). Curves were fit using a one-phase association equation (black) to determine the amount of titrant bound at saturation (Req). (C) Saturation binding data from BLI experiments (A, B) for USP5 ZnF-UBP (triangles) and Sad1 (squares) plotted against concentration of titrant. The USP5 ZnF-UBP data was fit using a one-site saturation binding model and give a KD value of 3.4 M (R2 = .9291) for USP5 ZnF-UBP, while a KD for Sad1 was indeterminable.

Supplemental Figure 3: Sad1 does not bind to yeast GST-UBLs *in vitro.* (A) GST-UBL immunoprecipitations with Sad1, or USP5. The only specific interaction that was observed was between GST-ubiquitin and the ZnF-UBP domain from USP5. (B) GST-UBL immunoprecipitations with Sad1, or Snu66. The only specific interaction observed was between GST-Hub1 and Snu66.

Supplemental Figure 4: Molprobity statistics for Sad1

Supplemental Figure 5: The ZnF-UBP from USP5 is missing the B site CCHH zinc binding motif and instead possesses conserved residues that participate in compensatory hydrogen bonds (A) Structural alignment of the B site zinc finger of SAD1 aligned to the same region of the ZnF-UBP from *H. sapiens* USP5 (green cyan, PDB ID: 2G43). The residues of USP5 that are engaged in compensatory hydrogen bonds are labeled as calculated by Pymol. Water molecules appear as small marine spheres. Sad1’s B site zinc atom is colored grey. (B) Primary sequence alignment of USP5 homologues aligned with the T-coffee server. The *H. sapiens* USP5 residues that engage in the compensatory B site zinc finger interactions in supplemental figure 5A are indicated and outlined in green cyan boxes, except for the USP5 homologues from *S. pombe* and *S. cerevisiae*, which are boxed in red to indicate their difference. Shown below the alignment for reference are the equivalent residues in Sad1.
